# Supplementary material for: PPARδ Activation Acts Cooperatively with 3-Phosphoinositide-Dependent Protein Kinase-1 to Enhance Mammary Tumorigenesis
Source: PLoS One. 2011 Jan 13;6(1):e16215. doi: 10.1371/journal.pone.0016215 (PMC3020974; doi:10.1371/journal.pone.0016215)
Supplement: Table S2 — Gene ontology of heatmap subgroups. (XLS) [file pone.0016215.s006.xls]

## Sheet: Sheet1
Table S2. Gene ontology of heatmap subgroups
Name	Total Entities	Overlap	Percent Overlap	Overlapping Entities	P-value
Subgroup A: PDK1+GW vs WT+GW
lipid biosynthesis	115	4	3	ACACA,ACLY,ELOVL6,ACSS2	3.92263e-09
acetyl-CoA biosynthesis	6	2	33	ACLY,ACSS2	5.66476e-07
fatty acid biosynthesis	78	2	2	ACACA,ELOVL6	0.000112638
carbohydrate metabolism	296	2	0	SLC2A5,PDK4,ACLY	0.00160409
glucose transport	36	1	2	SLC2A5	0.00764125
muscle contraction	95	2	2	TRDN,HRC	0.000167206
Subgroup A': PDK1+GW vs WT+GW
muscle contraction	95	2	2	TRDN,TCAP,HRC, SMPX	0.000111716
calcium ion homeostasis	8	1	12	HRC, TRDN	0.00141874
cytolysis	29	1	3	MMD2	0.00513528
cytokine degradation	390	1	0	ASB5	0.0673136
Subgroup B: PDK1 vs WT+GW
fatty acid metabolism	110	3	2	FABP3,CPT1B,SLC27A2, ELOVL3	2.00254e-06
long-chain fatty acid transport	12	2	16	FABP3,CPT1B	3.48669e-06
fatty acid beta-oxidation	32	2	6	FABP3,CPT1B	2.6141e-05
energy generation	63	2	3	UCP1,COX7A1	0.000102553
G1-S transition of mitotic cell cycle	57	1	1	E2F5	0.0140748
