# Supplementary material for: PPARδ Activation Acts Cooperatively with 3-Phosphoinositide-Dependent Protein Kinase-1 to Enhance Mammary Tumorigenesis
Source: PLoS One. 2011 Jan 13;6(1):e16215. doi: 10.1371/journal.pone.0016215 (PMC3020974; doi:10.1371/journal.pone.0016215)
Supplement: Table S3 — Metabolites in the mammary gland of GW501516-treated wild-type mice vs. wild-type mice. (XLS) [file pone.0016215.s007.xls]

## Sheet: WT+GW vs WT
Table S3. Metabolites in the mammary gland of GW501516-treated wild-type mice vs. wild-type mice
MS Mass	CQ_ID	Name	Fold Change	WT	WT+GW	Algorithm	ESI
73.0292	cq_00300	Lactaldehyde	-1.48727	0.0266604	0.0179257	SIMCA	[M-H]
89.0237	cq_00133	Lactic acid	-1.53862	0.0817482	0.0531309	Random Forest	[M-H]
90.0551	cq_00927	Alanine	-1.62598	0.0181514	0.0111633	SIMCA, Random Forest	[M+H]
90.0551	cq_00154	Sarcosine	-1.62598	0.0181514	0.0111633	SIMCA, Random Forest	[M+H]
104.107	cq_16000	Valinol	-1.37884	0.00812479	0.00589247	Random Forest	[M+H]
115.003	cq_00086	Fumaric acid	-1.56879	0.0721838	0.0460125	SIMCA	[M-H]
117.019	cq_00026	Succinic acid	-1.54394	0.0615797	0.0398847	SIMCA, Random Forest	[M-H]
132.029	cq_00031	Aspartic acid	1.54135	0.0131348	0.0202454	SIMCA, Random Forest	[M-H]
132.077	cq_01850	3-Guanidinopropanoate	-1.45629	0.043785	0.0300662	SIMCA	[M+H]
133.014	cq_00109	Malic acid	-1.87696	0.0608967	0.0324443	SIMCA, Random Forest	[M-H]
147.045	cq_17401	Phenylpropiolic acid	-1.23153	0.0182397	0.0148106	SIMCA	[M+H]
150.06	cq_00046	Methionine	-2.2912	0.00885949	0.00386675	SIMCA	[M+H]
151.025	cq_00275	Xanthine	-1.71367	0.016965	0.0098998	SIMCA, Random Forest	[M-H]
163.06	cq_18299	Fructose	-2.03117	0.0109906	0.00541099	SIMCA, Random Forest	[M-H]
165.077	cq_00694	Fucose	-1.43393	0.0118648	0.00827431	SIMCA	[M+H]
167.02	cq_00265	Uric acid	-2.05923	0.0246022	0.0119473	SIMCA	[M-H]
175.025	cq_01631	Glucuronic acid	-1.96689	0.230022	0.116947	SIMCA	[M-H]
187.097	cq_04955	Azelaic acid; Nonanedioic acid	2.19911	0.00955726	0.0210175	Random Forest	[M-H]
232.155	cq_01730	Butanoylcarnitine	-1.32645	0.0486672	0.0366898	Random Forest	[M+H]
267.075	cq_00212	Inosine	-1.35382	0.176453	0.130338	SIMCA, Random Forest	[M-H]
268.105	cq_00153	Adenosine	-1.25199	0.0652521	0.0521189	Random Forest	[M+H]
422.33	cq_20090	Linoleyl carnitine	-13.285	0.00411245	0.000309557	SIMCA, Random Forest	[M-H]
514.285	cq_10842	Taurallocholic acid	-23.5463	0.0338373	0.00143705	SIMCA, Random Forest	[M-H]
514.285	cq_10844	Tauro-b-muricholic acid	-23.5463	0.0338373	0.00143705	SIMCA, Random Forest	[M-H]
514.285	cq_02867	Taurocholic acid	-23.5463	0.0338373	0.00143705	SIMCA, Random Forest	[M-H]
514.285	cq_17134	Taurohyocholic acid	-23.5463	0.0338373	0.00143705	SIMCA, Random Forest	[M-H]
514.285	cq_10831	Tauroursocholic acid	-23.5463	0.0338373	0.00143705	SIMCA, Random Forest	[M-H]
524.37	cq_14947	1-O-Octadecyl-2-acetyl-sn-glycerophosphocholine	-1.87101	0.468846	0.250585	SIMCA	[M+H]
611.149	cq_00091	Oxidized glutathione; Glutathione disulfide	-1.5038	0.113661	0.0755822	SIMCA, Random Forest	[M-H]
613.158	cq_00091	Oxidized glutathione; Glutathione disulfide	-1.5	0.134999	0.0916422	SIMCA	[M+H]
788.524	cq_19896	Diarachidonoylphosphatidylethanolamine	41	6e-05	0.00229	SIMCA	[M+H]
